CORRECTION

# Correction: Characterization of Carriage Isolates of *Neisseria meningitidis* in the Adolescents and Young Adults Population of Bogota (Colombia)

The *PLOS ONE* Staff

## Notice of Republication

This article was republished on September 21, 2015, to correct an error in the title that was introduced during production of the article: *meningitides* incorrectly read *meningitides*. The publisher apologizes for the error. Please view the originally published, uncorrected article and the republished, corrected article here.

## Supporting Information

**S1 File. Originally published, uncorrected article.**  
(PDF)

**S2 File. Republished, corrected article.**  
(PDF)

## Reference

1. Moreno J, Hidalgo M, Duarte C, Sanabria O, Gabastou JM, Ibarz-Pavon AB (2015) Characterization of Carriage Isolates of *Neisseria meningitidis* in the Adolescents and Young Adults Population of Bogota (Colombia). PLoS ONE 10(8): e0135497. doi: [10.1371/journal.pone.0135497](https://doi.org/10.1371/journal.pone.0135497) PMID: [26322796](https://pubmed.ncbi.nlm.nih.gov/26322796/)

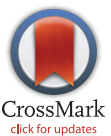

## OPEN ACCESS

**Citation:** The *PLOS ONE* Staff (2015) Correction: Characterization of Carriage Isolates of *Neisseria meningitidis* in the Adolescents and Young Adults Population of Bogota (Colombia). PLoS ONE 10(10): e0139983. doi:10.1371/journal.pone.0139983

**Published:** October 5, 2015

**Copyright:** © 2015 The PLOS ONE Staff. This is an open access article distributed under the terms of the [Creative Commons Attribution License](https://creativecommons.org/licenses/by/4.0/), which permits unrestricted use, distribution, and reproduction in any medium, provided the original author and source are credited.
